# Supplementary material
Source: publisher figshare collection journal article supplement (https://acs.figshare.com/ndownloader/files/8025047)
Supplement: Supplementary file 1 [file 8025047]

Supporting Information for

**Bi-directional DNA Walking Machine and Its Application in  
an Enzyme-Free Electrochemiluminescence Biosensor for  
Sensitive Detection of MicroRNAs**

**Lichun Peng, Pu Zhang, Yaqin Chai\*, Ruo Yuan\***

*Key Laboratory of Luminescent and Real-Time Analytical Chemistry (Southwest  
University) , Ministry of Education, School of Chemistry and Chemical Engineering,  
Southwest University, Chongqing 400715, PR China*

\* Corresponding author. Tel.: +86-23-68252277; Fax: +86-23-68253172.

*E-mail address:* yqchai@swu.edu.cn, yuanruo@swu.edu.cn;

**Contents of the Supporting Information:**

**The oligonucleotides sequences used in this work----S2**

**The buffers involved in this work----S3**

**Characterization of the proposed CdS:Mn NCs and Au NPs----S3**

**Optimum of the volume of CdS:Mn NCs and the concentration of the DNA  
track----S4**

**Reproducibility of the proposed biosensor. ----S5**

**Table S1. DNA Sequences Used In This Study**

| name                       | sequences (5'-3')                                                               |
|----------------------------|---------------------------------------------------------------------------------|
| W1                         | GGA TAC TGA ACC TAG AGA GCA GA                                                  |
| W2                         | TCT GCT CTC TAG TTA ATA TCA GT-(CH <sub>2</sub> ) <sub>6</sub> -NH <sub>2</sub> |
| T1                         | CTG ATA ACT ACG AAA GGG AGT GGC TCG GA                                          |
| T2                         | TCC GAG CCA CTC CCT GGA CAC CAT CTA AAC<br>ACT TGT ATG GGA CG                   |
| T3                         | CGT GAT AGA AAC AAT GCA AAG ACA CGT TAC<br>GTT TAG ATG GTG TCC                  |
| ssDNA                      | GTA ACG TGT CTT TGC TCC T-(CH <sub>2</sub> ) <sub>6</sub> -NH <sub>2</sub>      |
| A2                         | GTT CAG TAT CCC GTC CCA TAC A                                                   |
| D1                         | TCA ACT CAG TCT GAT AAG CTA                                                     |
| A3                         | ACC CCT ATC ACG ATT AAT ATT AA                                                  |
| B1                         | GTA CTT ATC AGA CTG ACA TTAA                                                    |
| p53 gene                   | TCA TCA CAC TGG AAG ACT C                                                       |
| oral cancer (ORVOA 1) gene | CAG AAA AGA CTC TCG TTC TTT                                                     |
| miRNA-21                   | UAG CUU AUC AGA CUG AUG UUG A                                                   |
| miRNA-155                  | UUA AUG CUA AUC GUG AUA GGG GU                                                  |
| miRNA-199a                 | ACA GUA GUC UGC ACA UUG GUU A                                                   |
| miRNA-182-5p               | UUU GGC AAU GGU AGA ACU CAC ACU                                                 |

**The buffers involved in this work.** DNA hybridization buffer (HB1): 10 mM

Tris-HCl, 1.0 mM EDTA, 1.0 M NaCl (pH 7.0). MiRNA hybridization buffer (HB2):

10 mM Tris-HCl, 1.0 mM EDTA, 0.2 M NaCl, 10 mM MgCl<sub>2</sub> (pH 8.0), 0.1 M phosphate buffered solutions (PBS, pH 7.0, 8.0). PBS was employed as working buffer, containing 10 mM Na<sub>2</sub>HPO<sub>4</sub>, 10 mM NaH<sub>2</sub>PO<sub>4</sub> and 2.0 mM MgCl<sub>2</sub>. Ultrapure water (specific resistance of 18 M $\Omega$ ·cm) obtained from ultrapure water systems controller (Lidi, Chongqin, China) was used throughout the study.

**TEM characterization of CdS:Mn NCs and Au NPs.** To prove the successful synthesis of CdS:Mn NCs and AuNPs, TEM was employed to characterize the nanomaterials. The prepared CdS:Mn NCs had a nearly spherical shape and average size of 5 nm (Figure S1A). Lattice fringes of CdS:Mn NCs could be clearly observed from HRTEM image (Figure S1B). The gingili-like dark spots of the particles were AuNPs whose average particle size was 5 $\pm$ 1 nm (Figure S1C).

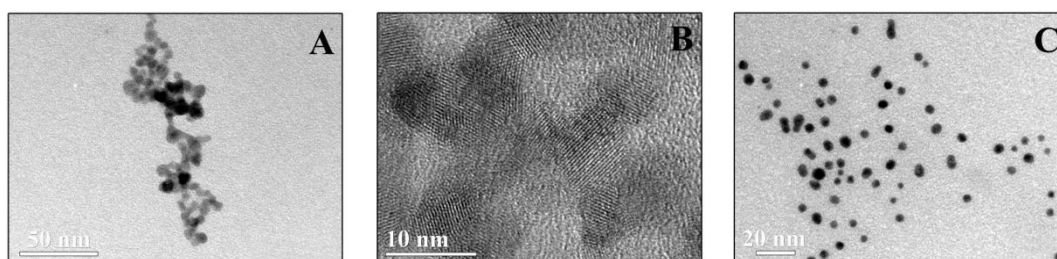

**Figure S1.** (A) TEM image of CdS:Mn NCs, (B) HRTEM image of CdS:Mn NCs, and (C) TEM image of AuNPs.

**Optimization of the detection conditions.** Experimental parameters containing the volume of CdS:Mn NCs and the concentration of the DNA track was optimized to achieve sensitive detection of miRNAs. From Figure S2A, the ECL intensity increased with increasing of the volume of CdS:Mn NCs and reached a relative stable value when the volume was greater than 30  $\mu$ L. As a result, 30  $\mu$ L was chosen as the optimal volume of CdS:Mn NCs in this work. Furthermore, the concentration of the

DNA track was also an important parameter for sensitive detection of miRNAs. In Figure S2B, with the increase of the concentration of DNA track, the ECL signal enhanced rapidly and then reached a constant value at 10  $\mu\text{M}$  because the ECL peak was barely changed when the concentration of the DNA track was higher than 10  $\mu\text{M}$ . Thus, the concentration of DNA track of 10  $\mu\text{M}$  was the optimal choice in the proposed biosensor.

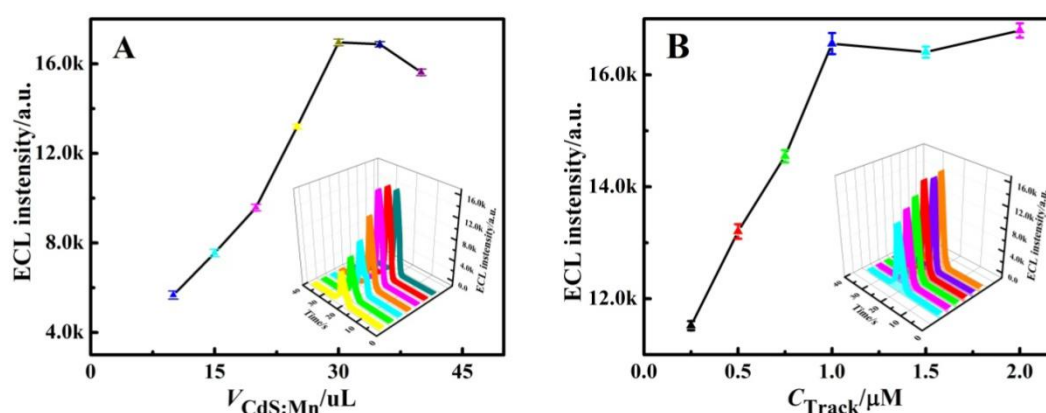

**Figure S2.** The optimization of (A) the volume of CdS:Mn NCs and (B) the concentration of the DNA track of the proposed biosensor. The ECL intensity of the biosensor was measured in 2 mL PBS (pH 8.0) with 0.05 M  $\text{S}_2\text{O}_8^{2-}$ . Error bars: standard deviation (SD),  $n = 3$ .

**Reproducibility of the proposed biosensor.** The reproducibility of the fabricated biosensor has been explored by determination of three different sensing electrodes modified under the same condition (Figure S3), and a relative standard deviation (RSD) of 3.83% was achieved. Moreover, different batches of obtained electrode were analyzed and the RSD value was 4.07%. These results demonstrated that the proposed biosensor presented a remarkable reproducibility.

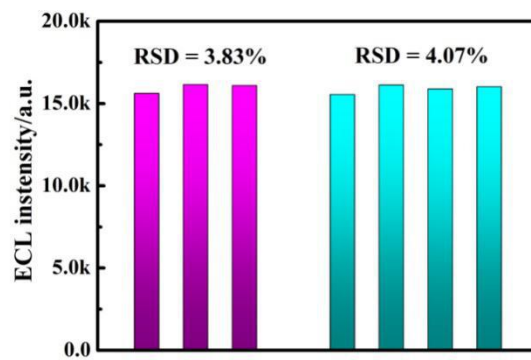

**Figure S3.** The reproducibility of the proposed biosensor.
